# Supplementary material for: Quantitative prediction of vasopressin secretion using a computational population model of rat magnocellular neurons
Source: Springer Nature journal article supplement (doi:10.1007/s10827-012-0399-3), 2012-06-11
Supplement: 10827_2012_399_MOESM4_ESM.pdf [file 10827_2012_399_MOESM4_ESM.pdf]

#### Online Resource 4 – Effect of varying the distribution of the current injection on plasma [AVP]

Implementation of a distribution of the resting membrane potential in the population of MCNs was necessary to obtain a realistic simulation of AVP secretion at the neurohypophysis (see results for detail). The distribution of the current amplitude injected in the MCNs was fixed at  $\pm 0.2 \mu\text{A}/\text{cm}^2$  ( $\approx 1 \text{ mV}$ ), which corresponds to the standard error reported in Mason's study (1983). However, variation of the membrane potential around the mean resting potential ( $-67 \text{ mV}$ ) appears larger ( $\approx 20 \text{ mV}$ , see results for detail) and such variation might affect the physiological realism of plasma [AVP]. Therefore, the robustness of our assumption of using  $0.2 \mu\text{A}/\text{cm}^2$  was tested by simulating plasma [AVP] as a function of the distribution of the current injection.

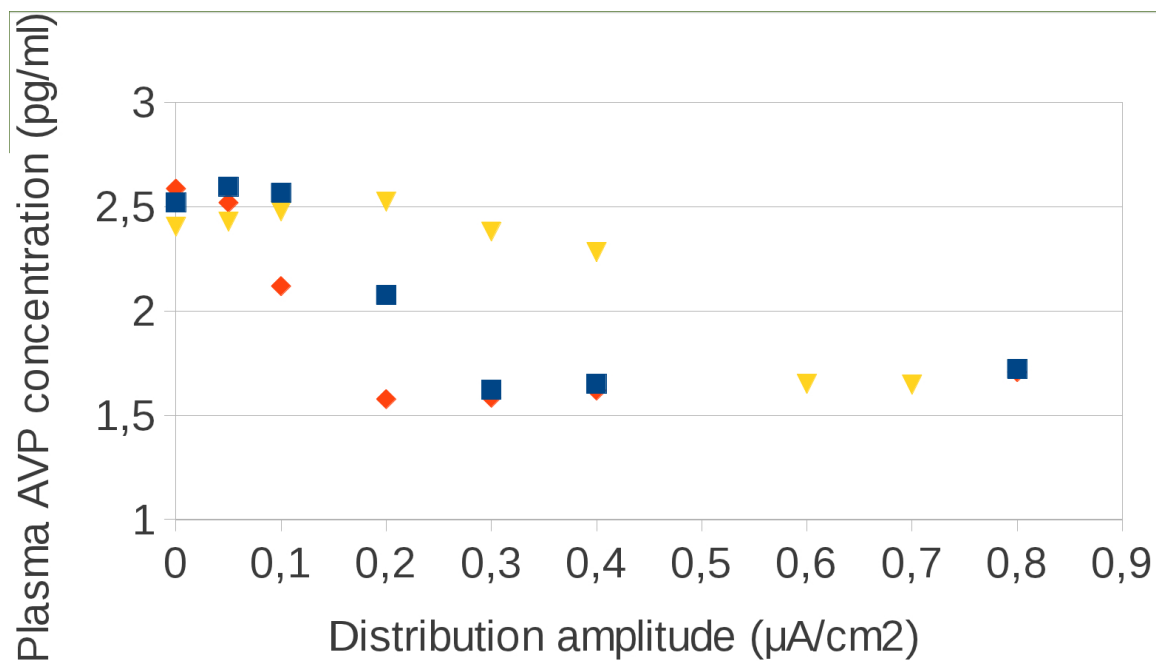

Effect of the distribution of the current injection on plasma [AVP] under three different osmotic concentrations :  $-10 \text{ mosmol/L}$  (orange diamond),  $0 \text{ mosmol/L}$  (blue square) and  $+10 \text{ mosmol/L}$  (yellow triangle).

The results validate the assumption of using  $\pm 0.2 \mu\text{A}/\text{cm}^2$  as the distribution of the current injection in the MCNs. At the level of the overall MCN population, the distribution of injected current ( $-0.2; 0; +0.2 \mu\text{A}/\text{cm}^2$ ) in each subtype of firing behavior (irregular, phasic and continuous firing) gives the best simulation of plasma [AVP] in response to a change in extracellular osmolality. Note that current distribution below  $0.2 \mu\text{A}/\text{cm}^2$  predicted maximal AVP secretion due to the step-function of the mean firing frequency of the MCN population (see results for detail). Current distribution above  $0.2 \mu\text{A}/\text{cm}^2$  predicted a low level of plasma [AVP]. This collapse of [AVP] was due to the combined action of (1) the DYN-mediated reduction in burst length in the increased neuronal population displaying a phasic pattern of firing and (2) the efficient conductance

failure occurring in the increased neuronal population displaying a fast continuous firing pattern.
