# Supplementary material for: Quantitative prediction of vasopressin secretion using a computational population model of rat magnocellular neurons
Source: Springer Nature journal article supplement (doi:10.1007/s10827-012-0399-3), 2012-06-11
Supplement: 10827_2012_399_MOESM5_ESM.pdf [file 10827_2012_399_MOESM5_ESM.pdf]

## Online Resource 5 - Summary of the code used to simulate an individual MCN.

The code has to be launched with the Scilab software (version 4.1.2).

```
// *****  
// Vasopressinergic Magnocellular neuron  
// Louis Nadeau - Louis.Nadeau.3@ulaval.ca  
// Initially based on Magno-0.45.sce but  
// modified to include vasopressin secretion  
// *****
```

```
function Simulate(Osmo,Time,Injected_I,Ratio_D,Ratio_PSP_Freq,Ratio_PSP_Amp,Seed,Path_to_File)  
ieee(2);          //Added so that log10(0) returns -inf instead of an error of singularity  
lines(0);         //Added so that its not necessary to press y or n after each page of output from scilab  
stacksize(4000000); //Increase the memory of scilab  
rand("seed",Seed); //Replace the random seed by a fixed one in order to obtain the exac same  
                  simulation each time, enable database reus
```

### //Parameters of the simulation related to time (in milisecond)

```
Resolution=Time*240;          //Number of calculated point in the simulation  
delta_t=Time/Resolution;     //Calculation of the time step of the simulation  
delta_t_half=delta_t/2;     //To save computation time later in the code delta_t/2 is done only once  
delta_t_sixth=delta_t/6;    //To save computation time later in the code delta_t/6 is done only once
```

### // Initial conditions and initialization of the simulation

```
V=-60;                //Initial membrane potential  
SpikeRecord=[];      //Record each spike position  
last_V=V;            //The value of V in the last time step  
Nb_Of_Currents=9;   //Number of currents  
D=9;                //Setting D to its initial concentration so it does not take forever to stabilize  
Instant_Freq=0;     //Instantaneous frequency based on the two last spikes  
I=zeros(Nb_Of_Currents,1); //Initialize the currents vector
```

### //Concentration initialization

```
Na_Internal=21.3;      //Internal Concentration of sodium (from richard1995)  
//Na_Internal=3; //Oliet1993  
Na_External=135;     //Zhang2007  
//Na_External=138.9; //Richard1995 //Na_External=120; //Oliet1993  
K_Internal=135;      //Internal Concentration of potassium (from richard1995)  
//K_Internal=150; //Oliet1993  
K_External=3;       //Zhang2007 //K_External=3; //External Concentration of  
potassium (from richard1995) //K_External=3; //Oliet1993  
Ca_External=4000000; //External concentration of calcium in nM (Roper2004)  
Ca_Internal=113;    //Internal concentration of calcium in nM (Roper2004)  
Ca=[Ca_Internal;Ca_Internal;Ca_Internal]; //Setting Ca to its resting concentration  
Delta_Sugar=Osmo;   //Change in the osmolality cause by an increase in sugar (mannitol)  
ENa=26.4*log(Na_External/Na_Internal); //Reversal potential of sodium current computed with the Nerst  
Equation at 33 celcius (average papers)  
EK=26.4*log(K_External/K_Internal); //Reversal potential of potassium current computed with the Nerst  
Equation at 33 celcius
```

```

PNaKSic=0.182+(Na_External-105)*0.0021333;//Calculation of the atypical permeability ratio of the SIC
channels
//E is set to its steady-state parameters
E=[ENa;12.5*log(Ca_External/Ca(1));EK;EK;EK;EK;ENa;EK;26.4*log((PNaKSic*Na_External+K_External)/(PN
aKSic*Na_Internal+K_Internal))];

```

### //Synaptic initialization

```

EPSP_Frequency=3.53*Ratio_PSP_Freq;//The average excitatory synaptic input is 3.53Hz in control condition
IPSP_Frequency=4.00*Ratio_PSP_Freq;//The average inhibitory synaptic input 4hz is in control condition
EPSP_Multiplier=2.39E-22*(289+Delta_Sugar)^8.79;//When the osmolarity increases, the number of EPSP
increases based on Richard 1997
IPSP_Multiplier=1;//The IPSP frequency may not change at the same speed as the EPSP frequency
EPSP_Probability=EPSP_Frequency*EPSP_Multiplier*Time/1000/Resolution;//Probability of receiving an
excitatory input
IPSP_Probability=IPSP_Frequency*IPSP_Multiplier*Time/1000/Resolution;//Probability of receiving an
inhibitory input
ISynaptic=0; //Set the synaptic input to 0 at the beginning

```

### //Current initialization

```

Delta_Osmo=Delta_Sugar;
if Delta_Osmo<-25 then Delta_Osmo=-25; end; //added because there is a saturation below 270 mmol/L
starting from 295 mmol/L in the experimental data
//for the main loop, m_infinity is compute in two lines to improve speed. Current 1,2,3,4 and 9 have the same
form and the use of vectorization save a lot of computing time
m_infinity(1:4)=(1)/(1+exp((last_V+[38;-10;-2;45])./[-4;-7;-11;-11]));
m_infinity(5:9)=[1/(1+exp(-1.120-2.508*log10((Ca(3)-
Ca_Internal)/1000)));1/((1+470/Ca(2)^2.38)*(1+exp((-last_V-140*log10(Ca(2))+370)/7.4)));1;tanh((Ca(1)-
Ca_Internal-20*D)/55);Delta_Osmo*0.0297+1];
//Here t_m and t_h are initialize and all their elements are set to their steady-state. In the main loop, only the
non-static elements are updated.
t_m=[%inf;1/(0.19*(-last_V+19.88)/(exp((-last_V+19.88)/10)-1)+0.046*exp(-
last_V/20.73));8/(exp((last_V+40)/19)+exp((-last_V-40)/20))+1.8;35/(1.1*exp((last_V+43)/17)+exp((-
last_V-20)/13));%inf;1.22;%inf;75;35000];
t_h=[20/((1+exp((last_V-1)/14))*(1+exp((last_V+30)/34)))-
0.075;%inf;%inf;5+120/(exp((last_V+75)/30)+exp((-last_V-45)/18));%inf;%inf;%inf;%inf;%inf];
//Since many elements of h_infinity have a value of 1, the fast "ones()" function is used to set the correct size
of h_infinity, afterward (and in the main loop) only the 3 currents with a dynamic inactivating parameters are
updated. Here we set those 3 currents to their steady-state
h_infinity=ones(9,1);
h_infinity([1;4;8])=(1)/(1+exp((last_V+[45;80;70])./[2;6.5;-7]));
//Sets the m and h parameters to their steady-state value
m=m_infinity;
h=h_infinity;

```

//Main loop, this loop and its functions do not contain comments since they are evaluated by scilab each time and its a waste of time

```

for i=2:Resolution
m_infinity(1:4)=(1)/(1+exp((last_V+[38;-10;-2;45])./[-4;-7;-11;-11]));
m_infinity(5:9)=[1/(1+exp(-1.120-2.508*log10((Ca(3)-
Ca_Internal)/1000)));1/((1+470/Ca(2)^2.38)*(1+exp((-last_V-140*log10(Ca(2))+370)/7.4)));1;tanh((Ca(1)-
Ca_Internal-20*D)/55);Delta_Osmo*0.0297+1];
t_m(2:4)=[1/(0.19*(-last_V+19.88)/(exp((-last_V+19.88)/10)-1)+0.046*exp(-
last_V/20.73));8/(exp((last_V+40)/19)+exp((-last_V-40)/20))+1.8;35/(1.1*exp((last_V+43)/17)+exp((-
last_V-20)/13))];

```

```

h_infinity([1;4;8])=(1./(1+exp((last_V+[45;80;70])./[2;6.5;-7]));
t_h(1:4)=[20/((1+exp((last_V-1)/14))*(1+exp((last_V+30)/34)))-
0.075;%inf;%inf;5+120/(exp((last_V+75)/30)+exp((-last_V-45)/18))];
E(2)=12.5*log(Ca_External/Ca(1));
E(9)=26.4*log((PNaKSic*Na_External+K_External)/(PNaKSic*Na_Internal+K_Internal));
Ca=Ca+delta_t*(([-0.9;-100;-1.6]*I(2))-(Ca-Ca_Internal)./[2330;1;656]);
I=[14;0.1;14;14;0.19;1;0.0169095;0;0.023546].*(m.^[3;2;3;4;2;1;1;1;1]).*h.*(last_V-E);
I(8)=0.0745*(0.6+0.4*(1-m(8)*h_infinity(8)))*(last_V-E(8));
m=m+delta_t*(m_infinity-m)./t_m;m([1;5;7])=m_infinity([1;5;7]);
h([1;4])=h([1;4])+delta_t*(h_infinity([1;4])-h([1;4]))./t_h([1;4]);
V=last_V-delta_t*(Injected_I+ISynaptic+sum(I));
if (V>0 & last_V<0 & (V-last_V)>0) then
    SpikeRecord($+1)=i;
    if length(SpikeRecord)>1 then
        Instant_Freq=1000*Resolution/(Time*(i-SpikeRecord($-1)));
        if Instant_Freq>15 then
            Freq_Effec=1.053-((1)/(1+exp((Instant_Freq-22.5)/-2.5)));
        else
            Freq_Effect=1;
        end;
    else
        Freq_Effect=1;
    end;
    D=D+Ratio_D*Freq_Effect*(0.001+D*0.06);
end;
D=D*(1-delta_t/5000);
last_V=V;
ISynaptic=ISynaptic-delta_t*ISynaptic/7.5;
if rand()<EPSP_Probability then ISynaptic=ISynaptic+Ratio_PSP_Amp*0.08*(last_V+38); end;
if rand()<IPSP_Probability then ISynaptic=ISynaptic+Ratio_PSP_Amp*0.04*(last_V+72); end;
end;
//Show the results
Freq=length(SpikeRecord)/Time*1000;
SpikeRecord=SpikeRecord*delta_t;
save(Path_to_File,SpikeRecord,Freq);
endfunction;

//Excute the argument when loaded through the scilab bath mode on the command line
arg=sciargs();
Simulate(evstr(arg(6)),evstr(arg(7)),evstr(arg(8)),evstr(arg(9)),evstr(arg(10)),evstr(arg(11)),evstr(arg(12)),
arg(13));
quit;

```
